# Supplementary material for: Utilizing host–guest interaction enables the simultaneous enhancement of the quantum yield and Stokes shift in organosilane-functionalized, nitrogen-containing carbon dots for laminated luminescent solar concentrators
Source: Royal Society of Chemistry journal article supplement (doi:10.1039/d0nr07163c), 2020-01-01
Supplement: d0nr07163c1.pdf [file d0nr07163c1.pdf]

## Supplementary Files

### **Utilizing host-guest interaction enables the simultaneous enhancement of the quantum yield and Stokes shift in organosilane-functionalized, nitrogen-containing carbon dots for laminated luminescent solar concentrators**

Hsiu-Ying Huang<sup>1</sup>, Maria Jessabel Talite<sup>2</sup>, Kun-Bin Cai<sup>1</sup>, Ruth Jeane Soebroto<sup>3</sup>,  
Sheng-Hsiung Chang<sup>1</sup>, Wei-Ren Liu<sup>4</sup>, Wu-Ching Chou<sup>2\*</sup>, and Chi-Tsu Yuan<sup>1\*</sup>

<sup>1</sup>Department of Physics, Chung Yuan Christian University, Taoyuan, Taiwan

<sup>2</sup>Department of Electrophysics, National Chiao Tung University, Hsinchu, Taiwan

<sup>3</sup>Master Program in Nanotechnology, Chung Yuan Christian University, Taoyuan,  
Taiwan

<sup>4</sup>Department of Chemical Engineering, Chung Yuan Christian University, Taoyuan,  
Taiwan

#### **AUTHOR INFORMATION**

##### **Corresponding Author**

\*E-mail: [wuchingchou@mail.nctu.edu.tw](mailto:wuchingchou@mail.nctu.edu.tw). Phone: +886-3-5712121#56129

\*E-mail: [ctyuan@cycu.edu.tw](mailto:ctyuan@cycu.edu.tw). Phone: +886-3-2653219

**Fig. S1. Fitted PL spectrum of as-synthesized, dilute Si-NCDs.**

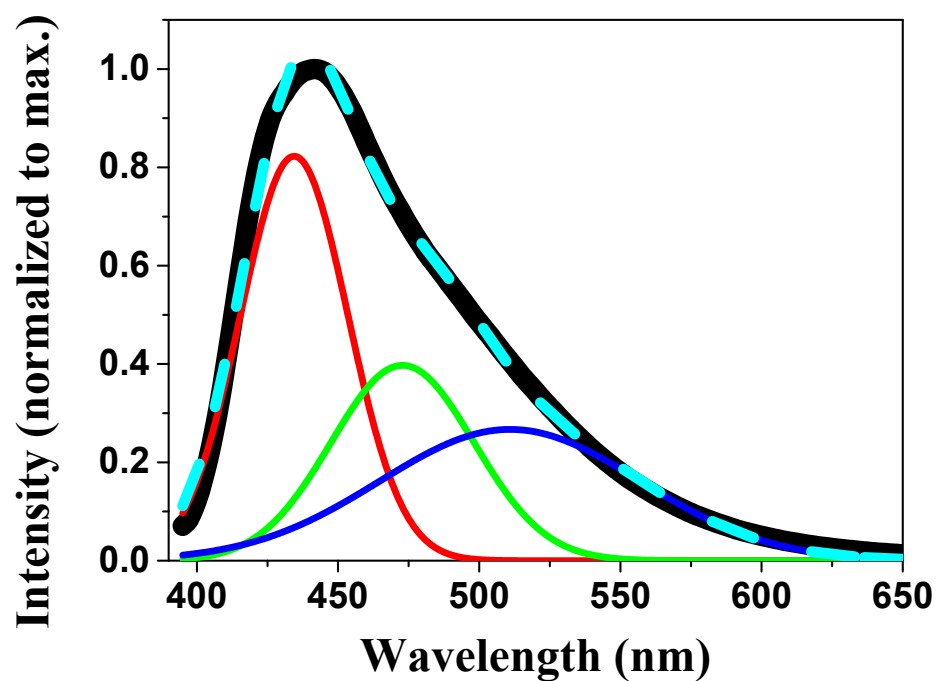

The PL spectrum of as-synthesized, dilute Si-NCDs can be fitted using three Gaussian functions, yielding three PL peaks at ~435, ~475, and ~515 nm.

**Fig. S2. Comparison of PL spectra for as-prepared, dilute Si-NCDs, and non-treated Si-NCDs@silica composites with ~1 and ~10 wt% loadings.**

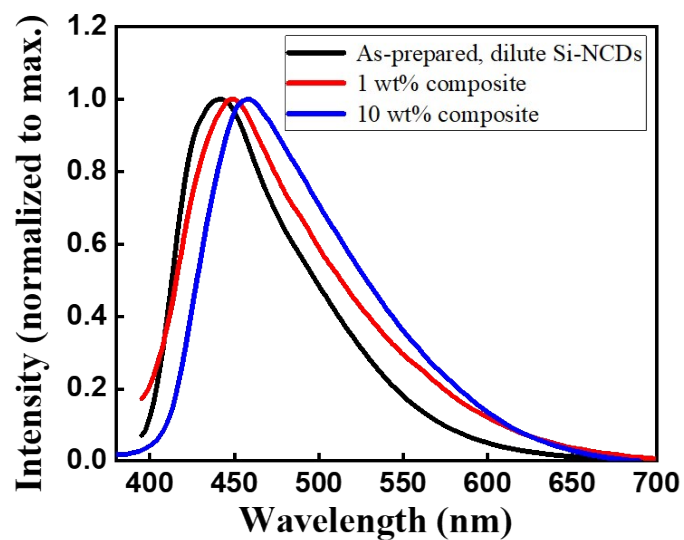

It can be found that except for slight PL red-shift due to reabsorption effect, their PL lineshape are similar with dominated blue-emitting centers.
